# **Magnitude Of Birth Outcome After Induced Labor Among Mothers Delivered In Nigist Eleni Mohammed Memorial Comprehensive Specialized Hospital, Hosanna Town, Hadiya Zone, Southern Ethiopia. Cross-Sectional Study**

Dereje Worku<sup>1\*</sup>, Tesfaye Assebe<sup>2</sup>, Tesfaye Gobena<sup>3</sup>, Temesgen Kechine<sup>4</sup>

<sup>1</sup>Wachemo University Nigist Eleni Mohammed Comprehensive specialized hospital

<sup>2</sup>Haramaya University College of Health and Medical Science, Department of Nursing, Harar, Ethiopia.

<sup>3</sup>Haramaya University College of Health and Medical Science, Department of Public health, Harar, Ethiopia.

<sup>4</sup>School of Nursing, College of Medicine and Health Science, Wachemo University, Ethiopia

**Corresponding Author: Temesgen Kechine**

**Email :** ([temesgenkechine59@gmail.com](mailto:temesgenkechine59@gmail.com))

**Affiliation:** Wachemo University, Hosanna, Ethiopia

**Keywords:** Birth outcome, Induction of labor, still birth.

**Word count:** 6613

**Reference count:** 71

## Abstract

**Background.** “Induction of labor is not risk free, despite its importance for ending risky pregnancy compare to spontaneous onset of labor it has potential harms and it increases the rate of different maternal and neonatal complications.” Due to this WHO recommends IOL with only clear medical indications when the benefit more significant than potential harms. Even though there is a few study on IOL that address magnitude of birth outcome after IOL no study is found that determine the contributing factors to birth outcomes after IOL in Ethiopia especially in my study area, therefore the factors that affect the birth outcome after IOL need to be clearly understood.

**Objective:** To assess the magnitude birth outcome after induced labor and associated factor among child bearing mother who deliver in NEMMCSH in the last two years (January 01, 2019 to December 31, 2020 GC). Data was collected from June 25 to July 09, 2021 GC.

**Methods:** Hospital based retrospective cross-sectional study was conducted on 778 study participants selected by systematic random sampling technique among all child bearing mothers delivered by induction in NEMMCSH from January 01, 2019 to December 31, 2020 GC. Data was collected from patient cards, delivery registration log books and operation note books. Then data were entered and coded using EPI data version 3.1 and analyzed using SPSS version 25. Bivariate and multivariate logistic regression analysis was carried out to determine the association different potential factors with the birth outcome after IOL. Independent predictors were determined using adjusted odd ratio with 95% CL at p value < 0.05 in multivariate logistic regression analysis.

**Results:** In this study the magnitude of still birth after IOL was 9.6%. Rural residence [AOR=3.59; 95%CI:(1.32, 9.80)], maternal chronic medical diseases [AOR=3.58; 95% CL: (1.23, 10.41)], history of previous still birth [AOR=7.45; 95%CI: (2.45, 22.38)], Partograph use [AOR=0.034; 95%CI: 0.01,0.09], delivering <8 hours[AOR=0.13; 95%CI: (0.03,0.56)] and delivering within 8-16[AOR=0.28; 95%CI:(0.10, 0.76)] hours were significant predictors for still birth.

**Conclusions:** The magnitude of still birth after IOL was relatively high in the study area. Variables which increase the likelihood of still birth were, living in rural area and previous history of still birth. The recommendations also forwarded for health care provider, NEMMCSH, different stakeholders and for researchers.

**Keywords:** Birth outcome, Induction of labor, still birth.

## Introduction

“Induction of labor is defined as the process of artificially stimulating the uterus to start labor. It is usually performed by administering oxytocin or other prostaglandin to the pregnant women, or by artificially rupturing of the amniotic membrane” (67)

During complications of pregnancy (PROM, pre-eclampsia, IUGR, and post term pregnancy) that confer significant ongoing risk for the fetus and the mother IOL is often the most important medical intervention utilized to decrease the neonatal and maternal morbidity and mortality (18).

IOL can be planned (elective) or emergency. Elective induction is usually done with prior planning by health care provider and the mother when continuing the pregnancy beyond certain weeks has risk for the mother or the fetus, in such case of, PROM, DM, hypertension, postdate pregnancy, small or large for baby. Emergency induction is done when there is an emergency maternal or fetal conditions that necessitates induction of labor immediately in case of pronged PROM, severe IUGR, and intrauterine infection, pregnancy beyond 42 weeks and eclampsia and pre-eclampsia (54). So IOL is not risk free, despite its importance for ending risky pregnancy compare to spontaneous onset of labor it has potential harms and it increases the rate of different maternal and neonatal complications. Due to this WHO recommends induction of labor with only clear medical indications when the benefit more significant than potential harms (65).

A secondary analysis of WHO global survey shows IOL is associated with poor birth outcome such as still birth, low Apgar score at birth and at 5 minutes, low birth weight, need of NICU admission, in Asia and Africa (61). WHO and study in India and Nigeria also support the thought that IOL is associated with poor neonatal and maternal outcomes compared with spontaneous onset of labor (32, 55, and 66). Study in Ethiopia also shows that still birth, low Apgar score at one and five minutes after birth and need of admission to NICU are the common adverse birth outcome after IOL(15). In Ethiopia even if there are limited studies on IOL that address magnitude of still birth after IOL but there is no study that determine predictors of still birth after IOL. So this study can fill the gap by identifying the significant predictors after induction of labor.

A policy of planned induction was found to lower the risk of perinatal death (still birth and neonatal death) by about two-thirds compared to a policy of expectant management. The overall strength of evidence for offering IOL for women over 41 weeks of gestation is in order to lower the risk of CS (34). But Health care provider use appropriate or inappropriate indications for IOL which has an impact on resource for performing induction and on the overall CS rate and perinatal death. Rochelle et al. reviewed the records of 4541 induced pregnancies and found that 15% of induction were either not clinically indicated or not documented (41).

In the study area, induction of labor is a commonly done procedure but there is a limitation in undertaking a study on factors associated with still birth after labor induction in SNNPR region particularly in the study area. Therefore this study will help to fill the gap by identifying demographic factors, obstetrics factors, induction related factors, maternal related factors and labor and delivery related factors. Therefore, the aim of the study is to answer the following research questions :I) what is the magnitude of birth outcome after IOL, II) what are the factors affecting birth outcome after induction in the study area; identify predictors to make recommendations for practice, which we may hopefully reduce complication related to induction of labor.

## **Methods**

### **Study context**

The study was conducted on Nigst Eleni Mohammed memorial Comprehensive specialized hospital which is the only specialized hospital in Hadiya zone found in Hosanna town. Hosanna town is found 232 Km away from Addis Ababa, the capital city of Ethiopia in southwest of Ethiopia and 194 Km away from Hawassa, capital city of SNNPR. Nigst Eleni Mohammed memorial Comprehensive specialized hospital is one of the largest hospital which serves not only the zonal populations, but also the neighboring zones and Woredas such as Silte, Gurage, Halaba and Kembata - Tembaro over two million people residing in urban and rural parts of southwest Ethiopia.

### **Study design and period**

Hospital based retrospective cross-sectional study was employed. The study was conducted from

January 01, 2019 to December 31, 2020 GC. The data collection period was from June 25 to July 09, 2021.

### **Source population**

The source population of the study was all women who undergo IOL after 28 weeks of gestation at Nigist Eleni Mohammed memorial comprehensive specialized hospital from (January 01, 2019 to December 31, 2020 GC).

### **Study population**

The study population was all systematically selected women undergone induction after 28 weeks of gestation in Nigist Eleni Mohammed memorial comprehensive specialized hospital from (January 01, 2019 to December 31, 2020 GC).

### **Eligibility criteria**

#### **Inclusion criteria**

All registered women who had IOL after 28 weeks of gestation in Nigist Eleni Mohammed memorial comprehensive specialized hospital from (January 01, 2019 to December 31, 2020 GC).

#### **Exclusion criteria**

All registered women who had IOL without full documentation and multiple pregnancy

### **Sample Size Calculation and Sampling Technique**

A cross section study was conducted by reviewing records from (January 01, 2019 to December 31, 2020 GC (n=760). Systematic random sampling technique was employed to select the study participants

## Operational Definitions

**Still birth:** Fetus with no sign of life at birth following induced labor after 28 weeks of gestation but alive before the procedure of labor induction (15).

**Birth outcome:** the life status of the fetus at birth after induction of labor and registered on labor and delivery log book as alive birth or still birth (5, 24)

**Favorable bishop:** the bishop score having the value greater than 6.

Unfavorable bishop: bishop score having the value  $\leq 6$  (8, 49).

**Antenatal booking:** mother with even single ANC visit.

**Maternal medical condition:** mothers those who have medical problems such as DM, anemia, chronic hypertensive disorder, cardiac diseases and other chronic disease.

**Previous history of still birth:** mother with at least one previous history of still birth.

**Partograph use:** complete monitoring of the labor progress using Partograph from active phase of labor until delivery of baby.

**Induction to delivery time:** the time it takes the mother from starting induction to delivery of the fetus either vaginally or abdominally (24).

## Data Collection Tools and Quality Control

The data were collected by secondary data sources (document review) using a structured questioners composed of socio demographic, obstetric, induction related and labor and delivery related variables of women who undergone induction of labor. The questionnaires were prepared in English version from similar study (15, 24, and 40) the data collectors were five BSc midwife and supervised by one MSc midwife to follow the data collection process. The investigators and supervisor were checked data accuracy, consistency and completeness daily.

## **Statistical analysis**

The collected data were entered and analyzed using SPSS version 25. The data were cleaned before analysis. Descriptive statistics such as frequency and mean were used to describe the study participants. Crude and adjusted odds ratios (95%) confidence intervals were utilized to assess the determinant factors with the birth outcome after IOL. The criterion for selecting independent variables was set at p-value less than 0.25 in bi variable analysis for final model. To control for potential confounder, a multivariable binary logistic regression was performed. A two tailed p-value < 0.05 was performed to show statistical significant. Model fitness was performed with Hosmer-Lemeshow test. And also multicollinearity was checked using at < 10 variance inflation factor (VIF). There were no variables that have VIF greater than 10.

## **Ethical Considerations**

Before conducting this study Haramaya University College of Health and Medical Sciences Institutional Health Research Ethics Review Committee (HU-IHRERC) was secure ethical clearance, and Haramaya University was write Official letter to NEMMCSH. Confidentiality of the data was assured through using anonymous checklist and keeping the data in secured place. In addition the names of the study subjects and treating Health professionals were not included in the checklist. Participation for this study is fully voluntary. Moreover informed voluntary written and signed consent was obtained from the hospital medical director after informing the objectives of the study, the possible risk/benefits, confidentiality and rights to be part of this study.

## **Results**

### **Socio demographic and obstetrics characteristics of the mothers**

The mean ( $\pm$ SD) age of the mother in this study was 30.20( $\pm$ 6.279) years. More than half of the mothers 461(60.7%) were in the age group of 20-34years. The majority, 396 (52.1%) of the study subjects were urban dwellers in other way more than half of the mothers 507 (66.7%) were had birth more than one times and 612 (80.5%) of the mothers had ANC follow up at least one times. One hundred thirty six (17.9%), one hundred forty nine (29.6%) and one hundred sixty four (21.6%) of the mothers were had previous history of still birth, previous history of IOL and history of preterm pregnancy. Majority 547(72%) of the new born were had gestational age between 38 to 41 weeks and

the mean ( $\pm$ SD) gestational age of the neonate was 38.69( $\pm$ 1.829). More than half of the neonate 454(60.2%) were had birth weight between 2500-3999 grams.

Table 1: Socio demographic and Obstetrics characteristics of mothers after induction of labor in NEMMCSH south Ethiopia from January 01/2019 to December 31/2020. (n=760).

| Variables                        | Categories   | Birth Outcome |             | Total |
|----------------------------------|--------------|---------------|-------------|-------|
|                                  |              | Alive birth   | Still birth |       |
| Age of the mother                | <20          | 52(88.1)      | 7(11.9)     | 59    |
|                                  | 20-34        | 423(91.8)     | 38(8.2)     | 461   |
|                                  | $\geq$ 35    | 212(88.3)     | 28(11.7)    | 240   |
| Residence                        | Rural        | 307(84.3)     | 57(15.3)    | 364   |
|                                  | Urban        | 380(96.0)     | 16(4.0)     | 396   |
| Parity                           | Nulliparous  | 234(92.5)     | 19(7.5)     | 253   |
|                                  | Multiparous  | 453(89.3)     | 54(10.7)    | 507   |
| Gravidity                        | Primigravida | 207(92.4)     | 17(7.6)     | 224   |
|                                  | Multigravida | 480(89.6)     | 56(10.4)    | 536   |
| Gestational age before induction | Preterm      | 98(89.1)      | 12(10.9)    | 110   |
|                                  | Term         | 496(90.7)     | 51(9.3)     | 547   |
|                                  | Post term    | 93(90.3)      | 10(9.7)     | 103   |
| ANC follow up                    | Yes          | 585(95.6)     | 27(4.4)     | 612   |
|                                  | No           | 102(68.9)     | 46(31.1)    | 148   |
| History of still birth           | Yes          | 88(64.7)      | 48(35.3)    | 136   |
|                                  | No           | 599(96.0)     | 25(4.0)     | 624   |
| History of END                   | Yes          | 126(81.8)     | 28(18.2)    | 154   |
|                                  | No           | 561(92.6)     | 45(7.4)     | 606   |
| History of preterm pregnancy     | Yes          | 130(79.3)     | 34(20.7)    | 164   |
|                                  | No           | 557(93.5)     | 39(6.5)     | 596   |
| History of previous IOL          | Yes          | 130(87.2)     | 19(12.8)    | 149   |
|                                  | No           | 557(91.2)     | 54(8.8)     | 611   |
| Outcome of previous IOL          | Successful   | 65(90.3)      | 7(9.7)      | 72    |
|                                  | Failed       | 62(83.8)      | 12(16.2)    | 74    |



|                           |     |           |          |     |
|---------------------------|-----|-----------|----------|-----|
| History of birth asphyxia | Yes | 44(77.2)  | 13(22.8) | 57  |
|                           | No  | 643(91.5) | 60(8.5)  | 703 |
| History of referral       | Yes | 120(75.0) | 40(25.0) | 160 |
|                           | No  | 567(94.5) | 33(5.5)  | 600 |

### Induction of labor and delivery characteristics

Of the included 760 study subjects 310(40.8%) undergo induction of labor for the indication of PROM followed by PIH 232(30.5%) while, 12(1.6) pregnancies were either not clinically indicated or not documented and 637(83.8%) of the pregnancies were induced by oxytocin infusion and from 125(16.4) mothers who were induced by misoprostol all are taken virginally. From the total study participants included in this study 2 mothers were developed uterine rupture after induction of labor. In other way from the total 760 induced labor 592(77.9%) were successful. From the total mothers included in the study 100(13.2) of them were had chronic medical disease. Of these 17(17), 11(11), 38(38) and 34(34) were had chronic hypertension, cardiac problem, DM and others medical diseases respectively and the mean ( $\pm$ SD) time for induction to delivery was 13.20 $\pm$ 4.943.

Table 2: Induction and labor and delivery characteristics of women and new born after induction of labor in NEMMCSH south Ethiopia from January 01/2019 to December 31/2020 (n=760)

| Variables                  | Categories |           | Birth outcome |             | Total |
|----------------------------|------------|-----------|---------------|-------------|-------|
|                            |            |           | Alive         | Still birth |       |
| Indication for current IOL | Post term  | Yes       | 123(91.1)     | 12(8.9)     | 135   |
|                            |            | No        | 552(90.0)     | 61(10.0)    | 613   |
|                            | PROM       | Yes       | 289(93.2)     | 21(6.8)     | 310   |
|                            |            | No        | 398(88.4)     | 52(11.6)    | 450   |
|                            | PIH        | Yes       | 204(87.9)     | 28(12.1)    | 232   |
|                            |            | No        | 483(91.5)     | 45(8.5)     | 528   |
|                            | IUGR       | Yes       | 27(90.0)      | 3(10.0)     | 30    |
|                            |            | No        | 660(90.4)     | 70(9.6)     | 730   |
| Others** indications       | Yes        | 32(78.0)  | 9(22.0)       | 41          |       |
|                            | No         | 655(91.1) | 64(8.9)       | 719         |       |

|                                        |                   |           |           |     |
|----------------------------------------|-------------------|-----------|-----------|-----|
| Bishop score before IOL                | Unfavorable       | 473(90.3) | 51(9.7)   | 524 |
|                                        | Favorable         | 195(89.9) | 22(21.4)  | 217 |
| Type of induction                      | Elective          | 286(91.4) | 27(8.6)   | 313 |
|                                        | Emergency         | 401(89.7) | 46(10.3)  | 447 |
| Method of current induction            | Oxytocin infusion | 573(90.0) | 64(10.0)  | 637 |
|                                        | Misoprostol       | 109(93.2) | 8(6.8)    | 117 |
|                                        | ARM               | 5(83.3)   | 1(16.7)   | 6)  |
| Time duration from IOL to delivery     | <8                | 125(91.9) | 11(8.1)   | 136 |
|                                        | 8-16              | 371(91.2) | 36(8.8)   | 407 |
|                                        | ≥16               | 169(87.6) | 24(12.4)  | 193 |
| Complete use of Partograph             | Yes               | 638(97.1) | 19(2.9)   | 657 |
|                                        | No                | 49(47.6)  | 54(52.4)  | 103 |
| Was there Obstructed labor             | Yes               | 15(75.0)  | 5(25.0)   | 20  |
|                                        | No                | 672(90.8) | 68(9.2)   | 740 |
| Was there Cord prolapse                | Yes               | 24(72.7)  | 9(27.3)   | 33  |
|                                        | No                | 663(91.2) | 64(8.8)   | 727 |
| Mode of delivery after IOL             | SVD               | 269(92.8) | 21(7.2)   | 290 |
|                                        | Instrumental      | 268(86.7) | 41(13.3)  | 309 |
|                                        | Cesarean section  | 150(93.2) | 11(6.8)   | 161 |
| Was mother has chronic medical disease | Yes               | 67(67.0)  | 33(33.0%) | 100 |
|                                        | No                | 620(93.9) | 40(6.1)   | 660 |
| Chronic hypertension                   | Yes               | 12(70.6)  | 5(29.4)   | 17  |
|                                        | No                | 675(90.8) | 68(9.2)   | 743 |
| Cardiac disease                        | Yes               | 7(63.6)   | 4(36.4)   | 11  |
|                                        | No                | 680(90.8) | 69(9.2)   | 749 |
| DM                                     | Yes               | 22(57.9)  | 16(42.1)  | 38  |
|                                        | No                | 665(92.1) | 57(7.9)   | 722 |
| Others***medical disease               | Yes               | 26(76.5)  | 8(23.8)   | 34  |

|                           |     |           |         |     |
|---------------------------|-----|-----------|---------|-----|
|                           | No  | 661(91.0) | 65(9.0) | 726 |
| Drug use during pregnancy | Yes | 25(75.8)  | 8(24.2) | 33  |
|                           | No  | 662(91.1) | 65(8.9) | 727 |
| Grade two or three MSAF   | Yes | 36(90.0)  | 4(10)   | 40  |
|                           | No  | 651(90.4) | 69(9.6) | 720 |

### Neonatal characteristics after induction of labor

From the total induced pregnancies included in this study 15(2%) of the fetus developed non reassuring fetal heart rate pattern following induction. The mean ( $\pm$ SD) weight of the new born after induction of labor were 2755.97 grams  $\pm$ 614. In terms of sex of the new born 422(55.5%) were male. In other way above three fourth of the neonate 627(82.9) were had Apgar score seven and above during the fifth minute of delivery.

Table 3: Neonatal outcomes after induction of labor in NEMMCSH south Ethiopia from January 01/2019 to December 31/2020

| Variable                    | Categories     | Frequency | Percent |
|-----------------------------|----------------|-----------|---------|
| Outcome of the neonate      | Alive birth    | 687       | 90.4    |
|                             | Still birth    | 73        | 9.6     |
| Sex of the neonate          | Male           | 422       | 55.5    |
|                             | Female         | 338       | 45.5    |
| Apgar score at first minute | < 7            | 580       | 76.7    |
|                             | $\geq$ 7       | 176       | 23.3    |
|                             | No information | 4         |         |
| Apgar score at five minute  | < 7            | 129       | 17.1    |
|                             | $\geq$ 7       | 627       | 82.9    |
|                             | No information | 4         |         |
| NRFHRP after IOL            | Yes            | 15        | 2       |
|                             | No             | 745       | 98      |

|                        |                |     |      |
|------------------------|----------------|-----|------|
| Weight of the new born | ≤2499          | 265 | 35.1 |
|                        | 2500-3999      | 454 | 60.2 |
|                        | ≥4000          | 35  | 4.6  |
|                        | No information | 6   |      |
| Need of NICU admission | Yes            | 165 | 21.7 |
|                        | No             | 595 | 78.3 |

### Magnitude of Birth outcome after induction of labor

From the total 760 mothers who undergo induction of labor included in this study 73(9.6%) with 95% confidence level of (7.6, 11.7) mothers were gave still birth.

### Factors associated to birth outcome after induction of labor

In multivariate analysis residence, maternal chronic medical disease, previous history of still birth, Partograph use, and induction to delivery time were significant predictors.

The odd of acquiring still birth among mothers who were rural dwellers were had 3.59 times higher than those mothers who were urban dwellers (AOR=3.59; 95%CI: (1.32, 9.80)). The odd of acquiring still birth among mothers who had previous history of still birth were 7.45 higher than those mothers who hadn't have previous still birth (AOR=7.45; 95%CI: (2.45, 22.38)). The odd of acquiring still birth among mothers who had chronic medical disease 3.58 times more likely than those mothers who hadn't medical diseases (AOR=3.58; 95% CL: (1.23, 10.41)).The odd of acquiring still birth among mothers who gave birth less than eight hours and between eight and sixteen hours were 87% (AOR=0.13; 95%CI: (0.03,0.56)) and 72% (AOR=0.28; 95%CI:(0.10, 0.76)) less likely than those mothers who gave birth after sixteen hours respectively. The odd of acquiring still birth among mothers who were had complete Partograph follow up during active stage of labor were 96.6% less likely than their counterparts (AOR=0.034; 95%CI: 0.01,0.09).

Table 4: Factors associated with birth outcome after induction of labor in NEMMCSH south Ethiopia from January 01/2019 to December 31/2020 (n=760)

| Categories | Birth outcome |             | COR (95% CI) | AOR (95% CI) |
|------------|---------------|-------------|--------------|--------------|
|            | Alive birth   | Still birth |              |              |

|                                    |             |           |          |                  |                        |
|------------------------------------|-------------|-----------|----------|------------------|------------------------|
| Residence                          | Rural       | 307(84.3) | 57(15.7) | 4.41(2.48,7.83)  | 3.59(1.32, 9.80)*      |
|                                    | Urban       | 380(96.0) | 6(4.0)   | 1                | 1                      |
| Age of the mother                  | < 20        | 52(88.1)  | 7(11.9)  | 1                | 1                      |
|                                    | 20-34       | 423(91.8) | 38(8.2)  | 0.67(0.28, 1.57) | 0.32(0.91, 1.11)       |
|                                    | ≥ 35        | 52(88.1)  | 7(11.9)  | 0.98(0.41, 2.37) | 0.48(0.10,2.23)        |
| Parity                             | Nulliparous | 234(92.5) | 19(7.5)  | 0.68(0.39,1.17)  | 1.93(0.599, 6.24)      |
|                                    | Multiparous | 453(89.3) | 54(10.7) | 1                | 1                      |
| ANC follow up                      | Yes         | 585(95.6) | 27(4.4)  | 0.10(0.06,0.17)  | 0.43(0.18, 1.05)       |
|                                    | No          | 102(68.9) | 46(31.1) | 1                | 1                      |
| Previous history of still birth    | Yes         | 88(64.7)  | 48(35.3) | 13.1(7.67,22.26) | 7.45(2.45, 22.38)**    |
|                                    | No          | 599(96.0) | 25(4.0)  | 1                | 1                      |
| History of END                     | Yes         | 126(81.8) | 28(18.2) | 2.77(1.66,4.61)  | 1.41(0.47, 4.25)       |
|                                    | No          | 561(92.6) | 45(7.4)  | 1                | 1                      |
| History of preterm pregnancy       | Yes         | 130(79.3) | 34(20.7) | 3.73(2.27,6.14)  | 1.34(0.46, 3.89)       |
|                                    | No          | 557(93.5) | 39(6.5)  | 1                | 1                      |
| History of birth asphyxia          | Yes         | 44(77.2)  | 13(22.8) | 3.16(1.61,6.20)  | 2.03(0.45,9.20)        |
|                                    | No          | 643(91.5) | 60(8.5)  | 1                | 1                      |
| History of referral                | Yes         | 120(75.0) | 40(25.0) | 5.72(3.45,9.45)  | 1.34(0.46, 3.85)       |
|                                    | No          | 567(94.5) | 33(5.5)  | 1                | 1                      |
| Partograph use                     | Yes         | 638(97.1) | 19(2.9)  | 0.02(0.01,0.05)  | 0.034(0.01,0.09)**     |
|                                    | No          | 49(47.6)  | 54(52.4) | 1                | 1                      |
| Time duration from IOL to delivery | <8          | 125(91.9) | 11(8.1)  | 0.62(0.29,1.31)  | 0.13(0.03,0.56)***     |
|                                    | 8-16        | 371(91.2) | 36(8.8)  | 0.68(0.39,1.18)  | 0.28(0.10, 0.76)****   |
|                                    | ≥16         | 169(87.6) | 24(12.4) | 1                | 1                      |
| Chronic Maternal medical disease   | Yes         | 67(67.0)  | 33(33.0) | 7.63(4.51,12.9)  | 3.58(1.23, 10.41)***** |
|                                    | No          | 620(93.9) | 40(6.1)  | 1                | 1                      |
| Drug use during pregnancy          | Yes         | 25(75.8)  | 8(24.2)  | 3.26(1.41,7.52)  | 1.05(0.19, 5.79)       |
|                                    | No          | 662(91.1) | 65(8.9)  | 1                | 1                      |
| New born weight                    | ≤2499       | 208(78.5) | 57(21.5) | 9.31(1.24,69.5)  | 2.68(0.25, 29.14)      |
|                                    | 2500-3999   | 439(96.7) | 15(3.3)  | 1.16(0.15,9.06)  | 0.39(0.04, 4.35)       |
|                                    | ≥4000       | 34(97.1)  | 1(2.9)   | 1                | 1                      |

Significant at: \*P=0.013, \*\*P=0.000, \*\*\*P=0.006, \*\*\*\*P=0.012, \*\*\*\*\*P=0.019

## Discussion

In this study the magnitude of still birth after induction of labor was 9.6% (95% CL: 7.6, 11.7).

This result is greater than study done in Wolaita Sodo university referral hospital which was 6.1%, Aksum referral hospital (2.4%) and study done in Sudan (2.5%), (5, 15, 35) but the result of this is less than study done in Dessie referral hospital which is 21%, (24). The discrepancy for this result could be the sample size difference, socio demographic condition (70).

In this study the three predominant indications for induction were PROM 310(40.8%), PIH 232(30.5%) and post term 135 (17.8%) the result is in line with study done in India, Nepal, Jimma university specialized hospital, Wolliso St. Luke, Catholic Hospital and study done in Hawassa public hospitals (1,28,32,52), However study done in Wolaita Sodo University specialized hospital the three predominant indication for induction were PROM, post term and medical disorder of pregnancy while study done in Addis Ababa shows the predominant indication for induction were preeclampsia, PROM and post term pregnancy(15,27). The finding of this study also shows that the prevalence of failed induction was

22.1% which is in line with study done in Jimma university specialized hospital which was 21.4%(28) but this result was less than study done in Wolaita Sodo university teaching referral hospital which is 41.3% and study done Addis Ababa public hospital(15,27), The difference for this result could be due to failure in maintaining serum oxytocin concentration during the change of infusion bag or dose increment interval being 20 minutes which is not in accordance with currently accepted oxytocin pharmacokinetics (30).

In this study the two predominant methods of induction were oxytocin infusion 637(83.8%) and misoprostol 117(15.4%). This finding is supported by study done in Northern Tanzania which was from 1088 mothers who underwent IOL 82.08% of them were induced by oxytocin infusion and 13% were induced by prostaglandin, study done in Hawassa public hospitals and study done in Tigray Mekelle(31,40,55).

In this study the leading cause for neonatal intensive care unit admission was respiratory distress. This finding is supported by study done in Wolaita Sodo University teaching referral hospital in which neonatal distress were the leading cause for NICU admission (15).

The finding of this study also showed that the odd of getting still birth after induction of labor was 3.59 times [AOR=3.59; 95%CI: (1.32, 9.80)] more likely in rural dwellers mothers compared to urban dwellers. Even if this study include only induced mothers the finding is supported by study done in Amhara region (37). The reason for this might be mothers with rural residence have poor access to

health information and there is also lack of transportation system to seek medical care and ANC follow up during pregnancy (21, 43).

The odd of getting still birth after induction of labor in this study was 7.45 times [AOR=7.45; 95%CI: (2.45, 22.38)] more likely in mothers who had previous history of still birth compared to those who hadn't. The finding of this study is supported by study done in Nigeria which shows mothers with previous still birth were had more likely to have still birth [AOR= 3.79; 95%CL : (1.60–9.00)] (48). The reason for this might be related to maternal Rh-factor, which leads to erythroblastosis fatalis (71).

In this study the odd of acquiring still birth after labor induction on mothers who had chronic medical diseases were 3.58 times more likely [AOR=3.58; 95% CL: (1.23, 10.41)] compared to those mothers who hadn't chronic medical diseases. This study is supported by study done in Tercha general hospital [AOR = 2.15; 95%CI :( 1.28–3.62] (56). This might be maternal chronic and repeated pregnancy related comorbidities that result in fetal death (70).

Partograph utilization by service providers was the other strong factor associated with still birth. In this study mothers who were followed by Partograph during active phase of labor were 96.6% (AOR=0.034, 95%CL: 0.01, 0.09) less likely of getting still birth after induction of labor compared to their counterparts. The result is supported by study done in Aksum referral hospital which shows mothers who do not monitored by Partograph during labor were more likely to have still birth [AOR=8.66;95%CL: (2.88–26.10)] (16). This is due to poor Partograph utilization may resulted in depriving intervention like; cesarean section, instrumental delivery and early detection of maternal and neonatal complications or this might be due to use of Partograph can help alert health care providers to pick any abnormalities during the course of labor. Therefore, it can prevent perinatal loss with early diagnosis and management of labor complications (63).

In this study mother who were gave birth less than eight hours and between eight and sixteen hours were 87% (AOR=0.13; 95%CI: (0.03,0.56)) and 72% (AOR=0.28; 95%CI:(0.10, 0.76)) less likely getting still birth after labor induction respectively compared to those mothers who were gave birth above sixteen hours. This finding is supported by cross-sectional study done in Bonga General and Mizan Tepi University teaching hospitals which was showed mother who had labor length greater than 24 hours were 5 times more likely at risk of still birth than those who had labor length less

than 24 hour (69). This might be due to prolonged labor increased risk of birth Aspasia, birth trauma, umbilical cord prolapse, PROM; which results increased perinatal mortality and morbidity (65).

## **Conclusion**

The magnitude of still birth after induction of labor was relatively high in the study area. Variables which increase the likelihood of still birth were, living in rural area, previous history of still birth and mothers with chronic medical diseases. However use of Partograph for assessing labor progress and giving birth before 16 hours after induction were decrease the likelihood of still birth. The determinants for still birth identified in this study can be prevented by providing appropriate care during antepartum and intrapartum period.

## **Acknowledgments**

The authors would like to acknowledge Wachemo University for financial assistance and Haramaya University for permission to conduct the thesis. Finally, authors would like to thanks study participants, data collectors and all concerned bodies who support us to conduct this thesis.

## **Author contributions**

DW, TA, TG, TK, were involved in the conception and design of the study, acquisition of data, analysis and interpretation of data, drafting and revising the article, agreed to submit to the current journal, gave final approval of the version to be published and agree to be accountable for all aspects of the work.

## **Funding**

Funding for this study was provided by Haramaya University. The funder has no direct contribution to the study except funding the research work. Award/Grant numbers are not applicable.

## **Declarations**

### **Ethics approval and consent to participate**

Ethical clearance was obtained from the Institutional Health Research Ethics Review Committee (IHRERC) Haramaya University, College of Health and Medical Sciences with Ethics approval number of IHRERC/074/2021. In addition, support letter was written to the hospital. The objective



and purpose of the study were verified briefly to the study participant and confidentiality was assured. Finally, written informed consent was obtained from study participants before conducting the interview. This study was conducted in accordance with the Declaration of Helsinki.

### Consent for publication

Not applicable.

### Competing interests

The authors declare that they have no competing interests.

### References

1. Abdulkadir Y, Dejene A and Geremew M. (2017) Induction of Labor Prevalence and Associated Factors for Its Outcome at
2. Wolliso St. Luke, Catholic Hospital, South West Shewa, Oromia. *Intern Med* 7.
3. Abisowo OY, Oyinyechi AJ, Olusegun FA, Oyedokun OY, Motunrayo AF and Abimbola OT. (2017) Feto-maternal outcome of induced versus spontaneous labour in a Nigerian Tertiary Maternity Unit. *Tropical Journal of Obstetrics and Gynaecology* 34: 21-27.
4. Abraha TH, Kasahun WW and Fisseha GK. (2020a) Failure of labor induction in Tigray region, Ethiopia: a retrospective record review study.
5. Abraha TH, Kasahun WW and Fisseha GK. (2020b) Failure of labor induction in Tigray region, Ethiopia: a retrospective record review study. preprint.
6. Abraha TH, Kasahun WW and Fisseha GK. (2020c) Failure of labor induction in Tigray region, Ethiopia: a retrospective record review study. preprint.
7. Acharya T, Devkota R, Bhattarai B and Acharya R. (2017) Outcome of misoprostol and oxytocin in induction of labour. *SAGE open medicine* 5: 2050312117700809.
8. ACOG. (2009) ACOG Practice Bulletin No. 107: Induction of labor. *Obstet Gynecol* 114: 386–397.
9. Alessandra Familiaria AK, c, Giuseppe Rizzod,e, Anthony Odibof,, Patrizia Verganig DB, Nobuhiro Hidakai, Daniele Di Mascioj,k,, Chinedu Nwabuobif SS, Federico Mecaccil, Silvia Visentinm, Eric Cosmim,, Marco Liberatih ADA, Maria Elena Flaccon, Cecilia Acuti Martelluccio,, Lamberto Manzolio LN, Carlotta Iacovellaq, Franz Bahlmannq, and Karen Melchiorrer GS, t, Vincenzo Berghellak, Francesco D’Antoniop. (2020)
10. A systematic review and meta-analysis. *European Journal of Obstetrics & Gynecology and Reproductive Biology*: 455–467.
11. Aminu M, Unkels R, Mdegela M, Utz B, Adaji S and Van Den Broek N. (2014) Causes of and factors associated with stillbirth in low-and middle-income countries: a systematic literature review. *BJOG: An International Journal of Obstetrics & Gynaecology* 121: 141-153.

12. Amna Aziz SI, Anam Fatima, Muhammad Nasir, Umaira Ali, Fatima Zia. (2020) A Study of Fetal Outcome in Induced versus Spontaneous Labor in Nulliparous Women at 41 Weeks of Gestation: Experience from a Tertiary Care Hospital. 14: 335-337.
13. Aragaw Y. (2016) Perinatal mortality and associated factor in Jimma university specialized hospital, south West Ethiopia. *Gynecol Obstet (Sunnyvale)* 6: 2161-0932.
14. Barthélémy Tandu - Umba\* RLT, Andy Mbangama Muela. (2013) Maternal and perinatal outcomes of induction of labor at term in the university clinics of Kinshasa, DR Congo. *Open Journal of Obstetrics and Gynecology* 3: 154-157.
15. Bekru ET and Yirdaw BE. (2018) Success of labour induction institution based cross-sectional study Wolaita Sodo, South Ethiopia. *International Journal of Nursing and Midwifery* 10: 161-167.
16. Berhe T, Gebreyesus H and Teklay H. (2019) Prevalence and determinants of stillbirth among women attended deliveries in Aksum general hospital: a facility based cross-sectional study. *BMC research notes* 12: 1-6.
17. Berhie KA and Gebresilassie HG. (2016) Logistic regression analysis on the determinants of stillbirth in Ethiopia. *Maternal health, neonatology and perinatology* 2: 1-10.
18. Bonsack CF LA, Blackburn M. (2014) Induction of Labor: Update and Review. *Journal of Midwifery & Women's Health* 10.
19. Bukola F, Idi N, M'Mimunya M, Jean-Jose W-M, Kidza M, Isilda N, *et al.* (2012) Unmet need for induction of labor in Africa: secondary analysis from the 2004-2005 WHO Global Maternal and Perinatal Health Survey (A cross-sectional survey). *BMC public health* 12: 1-10.
20. Dean Leduc M, Ottawa ON, Anne Biringer M, Toronto ON, Lily Lee M, Vancouver BC and Jessica Dy M, Ottawa ON. (2013) Induction of Labour. *J Obstet Gynaecol Can* 35: 840-857.
21. Dejene Tilahun<sup>1</sup>, Tsion Assefa<sup>1</sup>. (2017) Incidence and determinants of stillbirth among women who gave  
22. birth in Jimma University specialized hospital, Ethiopia. *Pan African Medical Journal*. 28.
23. Dessu S and Dawit Z. (2020) Perinatal Mortality and Associated Factors Among Antenatal Care Attended Pregnant Mothers at Public Hospitals in Gamo Zone, Southern Ethiopia. *Frontiers in Pediatrics* 8: 869.
24. Dilnessa T, Temesgen K and Workie A. (2019) The Proportion of Failed Induction of Labour and Associated Factors among Women Undergoing Induction of Labour in Dessie Referral Hospital: Northeast Ethiopia a Cross-sectional Study. *Asian Journal of Pregnancy and Childbirth*: 1-13.
25. Eyasu TB and Bezalem EY. (2018) Success of labour induction institution based cross-sectional study Wolaita Sodo, South Ethiopia. *International Journal of Nursing and Midwifery* 10: 161-167.
26. FMOH. (2010) Management Protocole On Selected Obstetric Topics. 1st ed. Addis Ababa;. 1-228 p.
27. Gebreyohannes RD and Mesfin E. (2020) Determinants of outcome of Induction of Labor in Four Teaching Hospitals in Addis Ababa, Ethiopia. *Ethiopian Medical Journal* 58.
28. Girma W, Tseadu F and Wolde M. (2016) Outcome of induction and associated factors among term and post-term mothers managed at Jimma University specialized hospital: a two years' retrospective analysis. *Ethiopian journal of health sciences* 26: 123-132.

29. Goba GK, Tsegay H, Gebregergs GB, Mitiku M, Kim KA and Alemayehu M. (2018) A facility-based study of factors associated with perinatal mortality in Tigray, northern Ethiopia. *International Journal of Gynecology & Obstetrics* 141: 113-119.
30. Hayes EJ WL. (2018) Improving patient safety and uniformity of care by a standardized regimen for the use of oxytocin. *Am J Obstet Gynecol* 198: 622.e621-622.e627.
31. Hurissa B, Geta M and Belachew T. (2015) Prevalence of failed induction of labor and associated factors among women delivered in Hawassa public health facilities, Ethiopia, 2015. *J women's health care* 4: 2167-0420.1000253.
32. Kavita Soni\*1 KS, Bharati Misra1, Brundaban Chandra Gouda1, Smita Chaudhary1. (2017) Maternal and perinatal outcome in induction of labour: A comparative study. *SJAMS* 5.
33. Kelkay Rade B, Moges Mitku Y, Weldemicheal AB, Zenebe ZM, Desalegn AY and Dimtsu Bitsu B. (2018) Induction of Labor and Its Determinant Factors: Retrospective Cross-Sectional Study from a Public Hospital in Ethiopia. *Journal of Pregnancy and Child Health* 05.
34. Khan NB, Ahmed I, Malik A and Sheikh L. (2012) Factors associated with failed induction of labour in a secondary care hospital. *Journal of the Pakistan Medical Association: JPMA* 62: 6.
35. Kheir AE, Mohamed RA, Osman NM and Ali RB. (2016) Comparison of neonatal outcome associated with induced labour versus planned vaginal delivery in a low-risk obstetric population. *Journal of Disease and Global Health* 8: 98-104.
36. Kiran Afshan1 GN, Mazhar Qayyum3. (2019) Risk factors and causes of stillbirths among pregnant women in Pakistan. *Afri Health Sci* 19: 1507-1516.
37. Lakew D, Tesfaye D and Mekonnen H. (2017) Determinants of stillbirth among women deliveries at Amhara region, Ethiopia. *BMC Pregnancy and Childbirth* 17: 1-7.
38. Lamichhane S, Subedi S, Banerjee B and Bhattarai R. (2016) Outcome of Induction of Labor: A Prospective Study. *Ann Int Med Dent Res* 2: 6-10.
39. Lawani OL, Onyebuchi AK, Iyoke CA, Okafo CN and Ajah LO. (2014) Obstetric outcome and significance of labour induction in a health resource poor setting. *Obstetrics and gynecology international* 2014.
40. Lueth GD, Kebede A and Medhanyie AA. (2020) Prevalence, outcomes and associated factors of labor induction among women delivered at public hospitals of MEKELLE town-(a hospital based cross sectional study). *BMC Pregnancy and Childbirth* 20: 1-10.
41. Lydon-Rochelle MT, Cárdenas V, Nelson JC, Holt VL, Gardella C and Easterling TR. (2017) Induction of labor in the absence of standard medical indications: incidence and correlates. *Medical care*: 505-512.
42. MacKinnon HJ, Schiff MA, Hoppe KK, Benedetti TJ and Delaney S. (2020) Increased length of active labor is associated with adverse perinatal outcomes among nulliparous women undergoing labor induction. *The Journal of Maternal-Fetal & Neonatal Medicine*: 1-7.
43. Mbachu II, Achigbu KI, Odinaka KK, Eleje GU, Osuagwu IK and Osim VO. (2018) Tracking stillbirths by referral pattern and causes in a rural tertiary hospital in Southern Nigeria. *Nigerian Postgraduate Medical Journal* 25: 87.
44. Melese MF, Badi MB and Aynalem GL. (2019) Perinatal outcomes of severe preeclampsia/eclampsia and associated factors among mothers admitted in Amhara Region referral hospitals, North West Ethiopia, 2018. *BMC research notes* 12: 1-6.
45. Melkie A, Addisu D, Atinafu B, Mekie M and Dagnew E. (2020) Contributing Factors to Failed Oxytocin Induction among Women Giving Birth at Referral Hospitals of Amhara

- Regional State, Ethiopia, in 2018: A Case-control Study. *Journal of Midwifery and Reproductive Health* 9: 2590-2596.
46. Mihiretu A, Negash T and Elazar T. (2017) Perinatal death and associated factors in Wolaita Sodo referral hospital, southern Ethiopia: a facility based cross-sectional study. *Primary Health Care: Open Access* 7: 1-5.
  47. Obsa M, Wolka Woticha E, Girma Weji B, Kassahun Dessu B, Dendir Wolde G, Gebremskel Girmay B, *et al.* (2019) Neonatal and fetal outcomes of pregnant mothers with hypertensive disorder of pregnancy at hospitals in Wolaita zone, southern Ethiopia. *Journal of Midwifery and Reproductive Health* 7: 1615-1620.
  48. Okonofua FE, Ntoimo LFC, Ogu R, Galadanci H, Mohammed G, Adetoye D, *et al.* (2019) Prevalence and determinants of stillbirth in Nigerian referral hospitals: A multicentre study. *BMC Pregnancy and Childbirth* 19: 1-9.
  49. Pimentel VM AM, Moon, J-Y, *et al.* (2018) Induction of labor using one dose vs multiple doses of misoprostol: a randomized controlled trial. *Am J Obstet Gynecol* 218: 1-8.
  50. Sarvanan N, Jha N, Dhodapkar SB and Kandasamy R. (2017) Fetomaternal Outcome in Medically Indicated Induction of Labour at Term Gestation. *Journal of Clinical and Diagnostic Research*.
  51. Shiferaw K, Mengiste B, Gobena T and Dheresa M. (2021) The effect of antenatal care on perinatal outcomes in Ethiopia: A systematic review and meta-analysis. *PLoS ONE* 16: e0245003.
  52. Shrestha DB, Malla R, Manandhar R, Khatri R, Shrestha C, Khatiwada R, *et al.* (2019) Prevalence and Outcome of Induction of Labor in a Tertiary Care Center of Kathmandu, Nepal. *Nepal Journal of Obstetrics and Gynaecology* 15.
  53. Souter V, Painter I, Sitcov K and Caughey AB. (2019) Maternal and newborn outcomes with elective induction of labor at term. *American journal of obstetrics and gynecology* 220: 273. e271-273. e211.
  54. Sujata P, Chanania K, Hansa J and Chanania K. (2017) Comparative Study between Elective Induction of Labour and Spontaneous Labour. *Advances in BioResearch* 8.
  55. Tarimo CS, Wu J, Obure J and Mahande MJ. (2020) Prevalence, associated factors, and outcomes for labor induction at a tertiary hospital in Northern Tanzania: A retrospective cohort study 2000-2015.
  56. Tebeje F, Addis A, Basher M and Hialu C. (2019) Determinants of Perinatal Mortality in Tercha General Hospital, Southern Ethiopia; Facility Based Case Control Study. Preprint.
  57. Thomas JS, Daniel M and Selvaraj S. (2018) Fetomaternal outcome following labour induction in oligohydramnios and borderline liquor: a retrospective study in a tertiary care hospital. *International Journal of Reproduction, Contraception, Obstetrics and Gynecology* 7: 4615.
  58. Vecchioli E, Cordier AG, Chantry A, Benachi A and Monier I. (2020) Maternal and neonatal outcomes associated with induction of labor after one previous cesarean delivery: A French retrospective study. *PLoS ONE* 15: e0237132.
  59. Vogel JP SJ, Mori R, Morisaki N, Lumbiganon P, Laopaiboon M,, Ortiz-Panozo E HB, Pérez-Cuevas R, Roy M, Mittal S, Cecatti JG, and Tunçalp Ö GA. (2014) Maternal complications and perinatal mortality: findings of the World Health Organization Multicountry Survey on
  60. Maternal and Newborn Health. *BJOG* 121: 76–88.
  61. Vogel JP, Souza J, Mori R, Morisaki N, Lumbiganon P, Laopaiboon M, *et al.* (2014) Maternal complications and perinatal mortality: findings of the World Health Organization

- Multicountry Survey on Maternal and Newborn Health. *BJOG: An International Journal of Obstetrics & Gynaecology* 121: 76-88.
62. Vogel JP, Souza JP and Gülmezoglu AM. (2013) Patterns and outcomes of induction of labour in Africa and Asia: a secondary analysis of the WHO Global Survey on Maternal and Neonatal Health. *PLoS ONE* 8: e65612.
  63. Wakgari N, Amano A, Berta M and Tessema GA. (2015) Partograph utilization and associated factors among obstetric care providers in North Shoa Zone, Central Ethiopia: a cross sectional study. *African health sciences* 15: 552-559.
  64. Welegebriel TK, Dadi TL and Mihrete KM. (2017) Determinants of stillbirth in Bonga General and Mizan Tepi University Teaching Hospitals southwestern Ethiopia, 2016: a case-control study. *BMC research notes* 10: 1-5.
  65. WHO. (2011) WHO Recommendations for induction of labor. *Geneva Switzerland: World Health Organization*.
  66. WHO. (2012) WHO recommendations for Induction of labour.
  67. WHO. (2018) WHO recommendations: Induction of labour at or beyond term
  
  68. Worede DT and Dagnaw GW. (2019) Determinants of stillbirth in Felege-Hiwot comprehensive specialized referral hospital, North-west, Ethiopia, 2019. *BMC research notes* 12: 1-6.
  69. Woubishet Girma1 FT, Mirkuzie Wolde1. (2016) Outcome of Induction and Associated Factors among Term and Post-Term Mothers Managed at Jimma University Specialized Hospital: A Two Years' Retrospective Analysis. *Ethiop J Health Sci.* 26.
  70. Yi Zhao CFaSK. (2017) Intrapartum intervention rates and perinatal outcomes following induction of labour compared to expectant management at term from an Australian perinatal centre. *Obstet Gynaecol* 57: 40-48.
  71. Zizzo AR, Kirkegaard I, Pinborg A and Ulbjerg N. (2017) Decline in stillbirths and perinatal mortality after implementation of a more aggressive induction policy in post-date pregnancies: a nationwide register study. *Acta obstetrica et gynecologica Scandinavica* 96: 862-867.

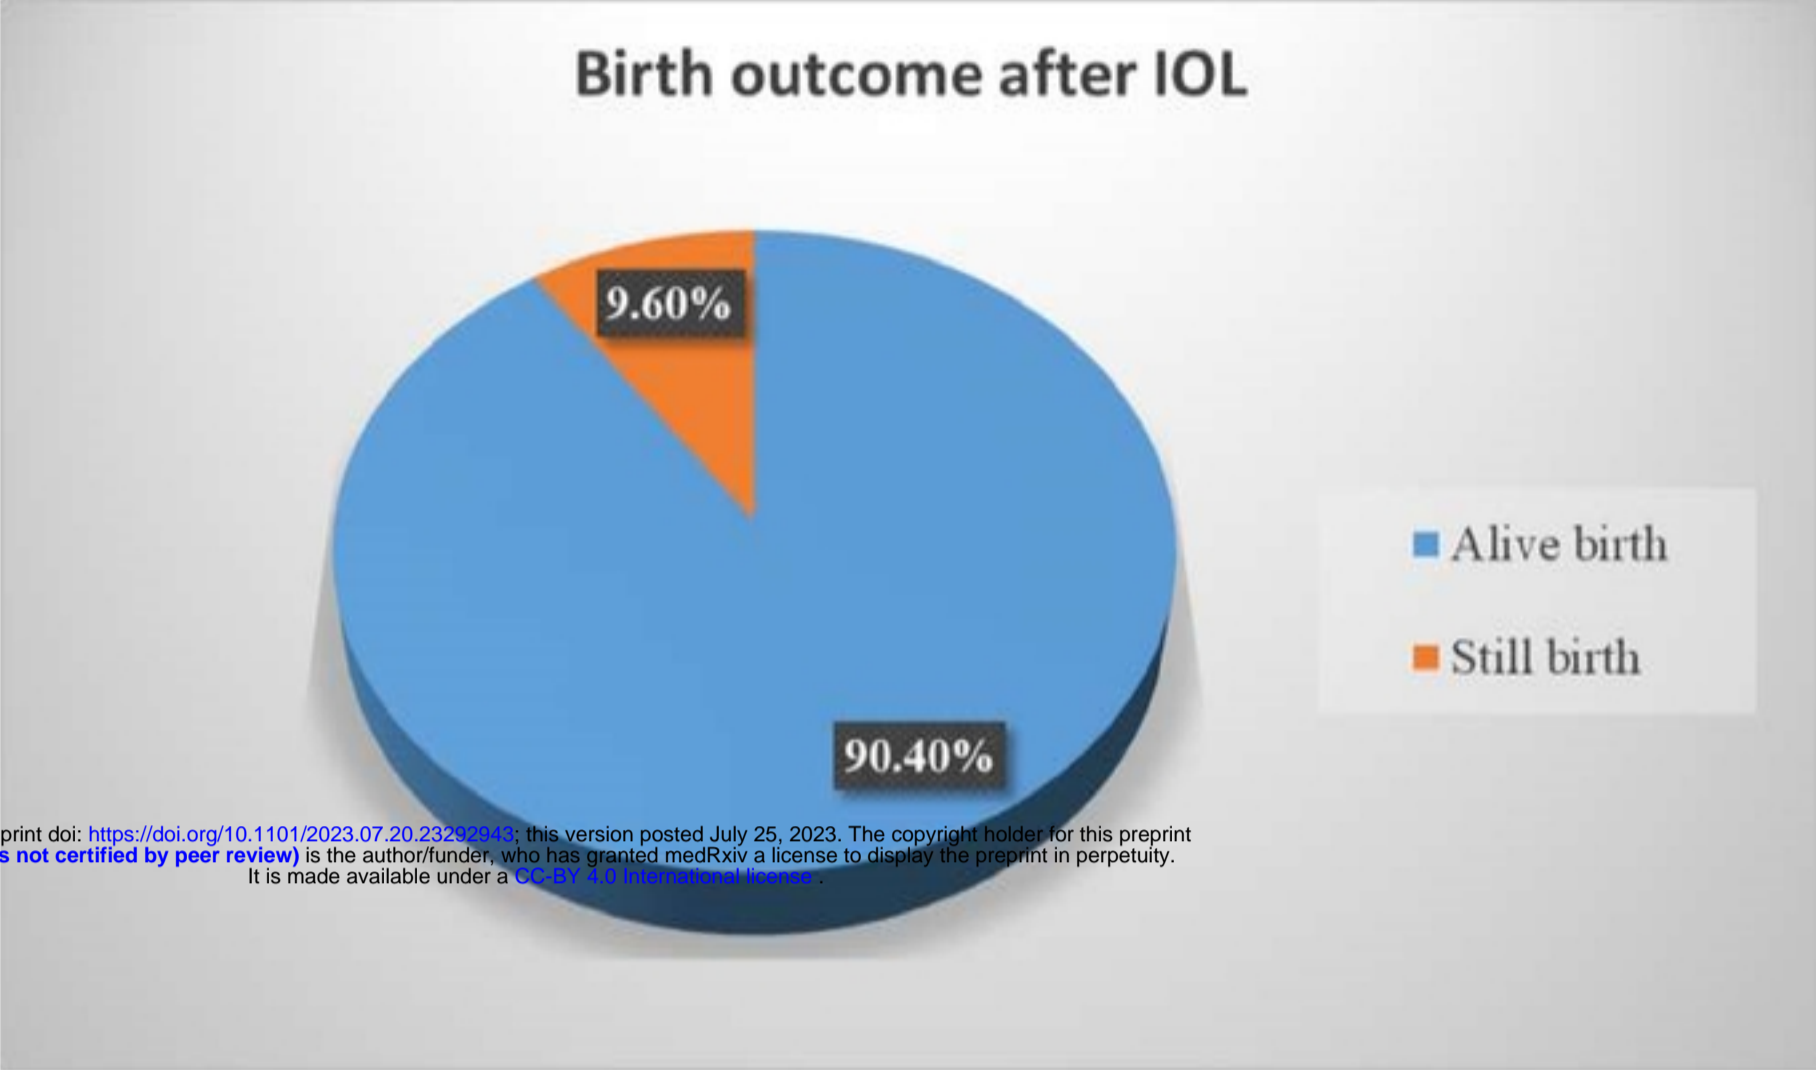

medRxiv preprint doi: <https://doi.org/10.1101/2023.07.20.23292943>; this version posted July 25, 2023. The copyright holder for this preprint (which was not certified by peer review) is the author/funder, who has granted medRxiv a license to display the preprint in perpetuity. It is made available under a [CC-BY 4.0 International license](#).

Figure 1: Birth outcome after induction of labor in NEMMCSH south Ethiopia from January 01/2019 to December 31/2020.
